# Supplementary material
Source: PubMed Central journal article supplement (PMC1892868)
Supplement: aem_73_9_2787__1.pdf [file aem_73_9_2787__1.pdf]

Table S1. Auxiliary bio-physico-chemical parameters in the Inland Sea of Japan.

| Location | Sampling date | Water temp<br>(°C) | Salinity<br>(PSU) | Chl <i>a</i> conc<br>(mg m <sup>-3</sup> ) | Dissolved organic carbon<br>(g m <sup>-3</sup> ) | Particulate organic carbon<br>(g m <sup>-3</sup> ) | Particulate organic nitrogen<br>(g m <sup>-3</sup> ) | Bacterial abundance <sup>a</sup><br>(x10 <sup>5</sup> cells ml <sup>-1</sup> ) |
|----------|---------------|--------------------|-------------------|--------------------------------------------|--------------------------------------------------|----------------------------------------------------|------------------------------------------------------|--------------------------------------------------------------------------------|
| ST1a     | 11.Jul.02     | 22.1               | 31.5              | 11                                         | ND <sup>b</sup>                                  | 2.3                                                | 0.26                                                 | 6.7±0.89                                                                       |
| ST2      | 11.Jul.02     | 22.2               | 31.6              | 2.6                                        | ND                                               | 0.79                                               | 0.11                                                 | 7.5±1.4                                                                        |
| ST3      | 11.Jul.02     | 22.9               | 32.6              | 0.35                                       | ND                                               | 0.45                                               | 0.092                                                | 5.8±0.59                                                                       |
| ST4      | 9.Jul.02      | 19.8               | 33.2              | 1.1                                        | ND                                               | 0.47                                               | 0.087                                                | 4.1±4.4                                                                        |
| ST5      | 9.Jul.02      | 21.6               | 33.1              | 0.38                                       | ND                                               | 0.41                                               | 0.10                                                 | 3.3±2.5                                                                        |
| ST1b     | 10.Jul.03     | 19.4               | 32.8              | 14                                         | 1.4                                              | 0.86                                               | 0.093                                                | 9.8±1.3                                                                        |
| ST7      | 12.Jul.03     | 24.7               | 33.6              | 0.98                                       | 0.79                                             | 0.38                                               | 0.033                                                | 29±3.6                                                                         |
| ST8      | 13.Jul.03     | 22.9               | 33.8              | 1.4                                        | 0.58                                             | 0.30                                               | 0.033                                                | 46±14                                                                          |
| ST9      | 14.Jul.03     | 22.4               | 34.4              | 1.5                                        | 0.84                                             | 0.29                                               | 0.037                                                | 41±4.2                                                                         |
| ST10     | 15.Jul.03     | 23.7               | 34.1              | 0.70                                       | 0.51                                             | 0.32                                               | 0.031                                                | 13±1.9                                                                         |

<sup>a</sup> Representing mean number ±1 SD of 10 microscope fields counted.

<sup>b</sup> No data
